# Supplementary material
Source: PubMed Central journal article supplement (PMC61136)

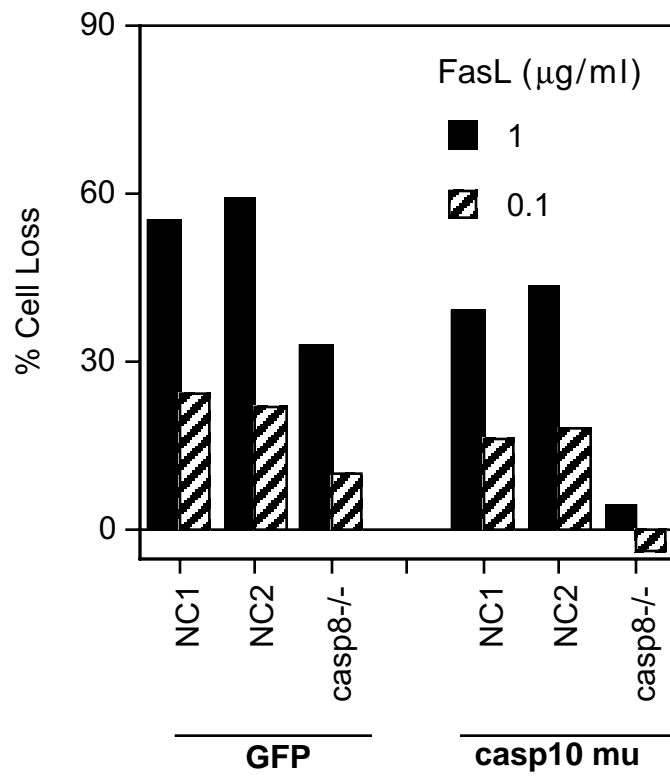

Supplement: pnas_98_24_13884__3.pdf [file pnas_98_24_13884__3.pdf]
